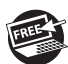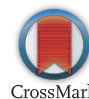

## Issues and Events

### PROFESSIONAL EDUCATION

Take advantage of our variety of continuing education activities and materials for health care professionals. Educational offerings include live and free online programs. Continuing education credits are available. For more information, please visit [professional.diabetes.org/ce](http://professional.diabetes.org/ce).

### SCIENTIFIC SESSIONS

The American Diabetes Association's Scientific Sessions brings together scientists and health care professionals from around the world who are involved in diabetes research and care. Attendees choose from over 3,000 original presentations given by leading experts in the field. For more information, please visit [scientificsessions.diabetes.org](http://scientificsessions.diabetes.org).

#### 77th Scientific Sessions

9–13 June 2017  
San Diego Convention Center  
San Diego, CA

**For more information regarding professional education, please e-mail [professionaleducation@diabetes.org](mailto:professionaleducation@diabetes.org) or call 1-800-DIABETES.**

### DIABETES STANDARDS OF CARE 2016 WEBCAST

Presented by Robert E. Ratner, MD, FACP, FACE, Chief Scientific and Medical Officer of the American Diabetes Association, this webcast identifies the Standards of Care recommendations to classify, diagnose, and treat prediabetes and diabetes. To access the webcast, please visit <http://healthmonix.com/ADAWebcastSOC2016/login.aspx>.

### DIABETES CORE UPDATE PODCASTS

*Diabetes Core Update* is a monthly audio podcast devoted to presenting and discussing the latest clinically relevant articles from the American Diabetes Association's scholarly journals. *Diabetes Core Update* audio podcasts are free and can be accessed through iTunes or RSS feed. For more information, please visit [diabetesjournals.org/site/podcasts.xhtml](http://diabetesjournals.org/site/podcasts.xhtml).

### ASSOCIATION-FUNDED RESEARCH DATABASE

The American Diabetes Association offers access to a searchable database with useful information on the Association-funded research grants. The database provides an easy way to learn more about the Association's Research Program and the critical and innovative biomedical research made possible through the generous support of donors and sponsors. Explore the database at [professional.diabetes.org/meetings/ada-funded-research](http://professional.diabetes.org/meetings/ada-funded-research).

### DIABETES CARE ONLINE COLLECTIONS

*Diabetes Care* periodically publishes special article collections related to a specific topic, study, or aspect of diabetes care, prevention, and treatment. These collections appear in the print and online editions of *Diabetes Care*. Learn more about previously published collections at <http://care.diabetesjournals.org/site/misc/onlinecollections.xhtml>.

*Diabetes Care* (print ISSN 0149-5992, online ISSN 1935-5548) is owned, controlled, and published monthly by the American Diabetes Association, Inc., 1701 North Beauregard St., Alexandria, VA 22311. *Diabetes Care* is a registered trademark of the American Diabetes Association. **Periodicals postage** paid at Alexandria, VA, and additional mailing offices. **POSTMASTER:** Send address changes to *Diabetes Care*, American Diabetes Association, Inc., Journal Subscriptions, 1701 North Beauregard St., Alexandria, VA 22311. Claims for missing issues should be made within 6 months of publication. The publisher expects to supply missing issues free of charge only when losses have been sustained in transit and when the reserve stock permits.
